# Supplementary material for: Tracking Animal Reservoirs of Pathogenic Leptospira: The Right Test for the Right Claim
Source: MDPI journal article supplement (doi:10.3390/tropicalmed6040205), 2021-11-30
Supplement: s1 [file s1]

**Table S1.** Details of bat samples, *Mormopterus acetabulosus* from Mauritius, used in the present study. The table includes the (a) Microscopic Agglutination Test (MAT) results and *Leptospira* molecular data obtained from the present study and the work of Dietrich et al. (2018) respectively. RT-PCR: Real-Time Polymerase Chain Reaction, CT: Cycle Threshold, FMNH: specimen deposited in the Field Museum of Natural History.

| Specimen ID No. | ID extraction | Sex | Age | Date (day/month/year) | Site                               | Serology results |                                         | Molecular results |       |                                  |
|-----------------|---------------|-----|-----|-----------------------|------------------------------------|------------------|-----------------------------------------|-------------------|-------|----------------------------------|
|                 |               |     |     |                       |                                    | MA T             | <i>Leptospira</i> serogroup (MAT titer) | RT - PCR          | CT    | <i>Leptospira</i> species        |
| FMNH 213456     | 152           | F   | A   | 14/12/10              | Palma Cave (Palma)                 | (-)              | -                                       | (+)               |       | <i>L. borgpetersenii</i> related |
| FMNH 213457     | 153           | F   | A   | 14/12/10              | Palma Cave (Palma)                 | (-)              | -                                       | (-)               | -     |                                  |
| FMNH 213458     | 154           | F   | A   | 14/12/10              | Palma Cave (Palma)                 | (-)              | -                                       | (+)               |       |                                  |
| FMNH 213459     | 155           | M   | A   | 14/12/10              | Palma Cave (Palma)                 | (-)              | -                                       | (-)               | -     |                                  |
| FMNH 213461     | 157           | M   | A   | 14/12/10              | Palma Cave (Palma)                 | (-)              | -                                       | (-)               | -     |                                  |
| FMNH 213463     | 159           | M   | A   | 14/12/10              | Palma Cave (Palma)                 | (-)              | -                                       | (+)               |       |                                  |
| FMNH 213465     | 161           | M   | A   | 14/12/10              | Palma Cave (Palma)                 | (-)              | -                                       | (+)               |       | <i>L. borgpetersenii</i> related |
| FMNH 213466     | 162           | M   | A   | 14/12/10              | Palma Cave (Palma)                 | (+)              | Pyrogenes (1:200)                       | (+)               |       | <i>L. borgpetersenii</i> related |
| FMNH 213467     | 163           | F   | A   | 14/12/10              | Palma Cave (Palma)                 | (-)              | -                                       | (+)               |       |                                  |
| FMNH 213470     | 166           | M   | A   | 14/12/10              | Palma Cave (Palma)                 | (-)              | -                                       | (+)               |       |                                  |
| FMNH 213471     | 167           | M   | A   | 14/12/10              | Palma Cave (Palma)                 | (-)              | -                                       | (+)               |       |                                  |
| FMNH 213472     | 168           | F   | A   | 15/12/10              | Twilight Cave (Roches Noires)      | (-)              | -                                       | (-)               | -     |                                  |
| FMNH 213475     | 171           | F   | A   | 15/12/10              | Twilight Cave (Roches Noires)      | (-)              | -                                       | (-)               | -     |                                  |
| FMNH 213477     | 173           | M   | A   | 15/12/10              | Twilight Cave (Roches Noires)      | (-)              | -                                       | (-)               | -     |                                  |
| FMNH 213474     | 170           | F   | A   | 15/12/10              | Twilight Cave (Roches Noires)      | (-)              | -                                       | (+)               |       |                                  |
| FMNH 213479     | 175           | F   | A   | 15/12/10              | Twilight Cave (Roches Noires)      | (-)              | -                                       | (+)               |       |                                  |
| FMNH 213481     | 176           | F   | A   | 15/12/10              | Twilight Cave (Roches Noires)      | (-)              | -                                       | (+)               |       |                                  |
| FMNH 213483     | 179           | M   | A   | 15/12/10              | Twilight Cave (Roches Noires)      | (-)              | -                                       | (-)               | -     |                                  |
| FMNH 213485     | 181           | F   | A   | 15/12/10              | Caverne Trois Bras (Moulin à Vent) | (+)              | Panama (1:100)                          | (+)               | 42,00 |                                  |
| FMNH 213486     | 182           | F   | A   | 15/12/10              | Caverne Trois Bras (Moulin à Vent) | (-)              | -                                       | (-)               | -     |                                  |
| FMNH 213487     | 183           | F   | A   | 15/12/10              | Caverne Trois Bras (Moulin à Vent) | (-)              | -                                       | (+)               | 34,00 | <i>L. borgpetersenii</i> related |
| FMNH 213489     | 185           | F   | A   | 15/12/10              | Caverne Trois Bras (Moulin à Vent) | (-)              | -                                       | (+)               | 37,00 |                                  |
| FMNH 213490     | 186           | F   | A   | 15/12/10              | Caverne Trois Bras (Moulin à Vent) | (-)              | -                                       | (+)               | 35,00 |                                  |
| FMNH 213491     | 187           | F   | A   | 15/12/10              | Caverne Trois Bras (Moulin à Vent) | (-)              | -                                       | (+)               | 38,00 |                                  |
| FMNH 213493     | 189           | F   | A   | 15/12/10              | Caverne Trois Bras (Moulin à Vent) | (+)              | Panama (1:200)                          | (+)               | 34,00 |                                  |

|                |     |   |   |          |                                       |     |                |     |       |
|----------------|-----|---|---|----------|---------------------------------------|-----|----------------|-----|-------|
| FMNH<br>213494 | 190 | F | A | 15/12/10 | Caverne Trois<br>Bras(Moulin à Vent)  | (+) | Panama (1:400) | (+) | 35,00 |
| FMNH<br>213495 | 191 | F | A | 15/12/10 | Caverne Trois Bras<br>(Moulin à Vent) | (-) | -              | (+) |       |
| FMNH<br>213503 | 199 | F | A | 16/12/10 | Camp Thorel Cave<br>(Camp Thorel)     | (+) | Panama (1:400) | (+) | 40,00 |
| FMNH<br>213504 | 200 | M | A | 16/12/10 | Camp Thorel Cave<br>(Camp Thorel)     | (-) | -              | (+) | 34,00 |
| FMNH<br>213508 | 204 | M | A | 16/12/10 | Camp Thorel Cave<br>(Camp Thorel)     | (+) | Panama (1:400) | (+) | 37,00 |

---
